# Supplementary material
Source: publisher figshare collection journal article supplement (https://tandf.figshare.com/ndownloader/files/22964606)

**Figure 5**

p-65


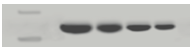


p65


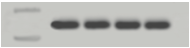


IkBα


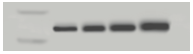


β-actin


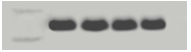


**Figure 6**

p-Akt


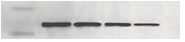


Akt


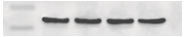


p-mTOR


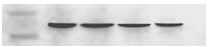


mTOR


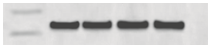


β-actin


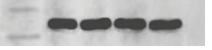

Supplement: Supplementary file 1 [file 22964606]
